# Supplementary material for: Chemically modified hCFTR mRNAs recuperate lung function in a mouse model of cystic fibrosis
Source: PubMed Central journal article supplement (PMC6233194; doi:10.1038/s41598-018-34960-0), 2018-11-13
Supplement: 41598_2018_34960_MOESM1_ESM.pdf [file 41598_2018_34960_MOESM1_ESM.pdf]

1 **Chemically modified hCFTR mRNAs recuperate lung function in a mouse model of cystic fibrosis**

2 **Authors:** AKM Ashiqul Haque<sup>1</sup>, Alexander Dewerth<sup>1</sup>, Justin S. Antony<sup>1,7</sup>, Joachim Riethmüller<sup>2†</sup>,

3 Georg R. Schweizer<sup>1</sup>, Petra Weinmann<sup>1</sup>, Ngadhnjim Latifi<sup>1</sup>, Hanzey Yasar<sup>3</sup>, Nicoletta

4 Pedemonte<sup>4</sup>, Elvira Sondo<sup>4</sup>, Brian Weidensee<sup>1</sup>, Anjali Ralhan<sup>5</sup>, Julie Laval<sup>5</sup>, Patrick Schlegel<sup>1</sup>,

5 Christian Seitz<sup>1</sup>, Brigitta Loretz<sup>3</sup>, Claus-Michael Lehr<sup>3,6</sup>, Rupert Handgretinger<sup>1,7</sup>, Michael S. D.

6 Kormann<sup>1\*</sup>

7 **Supplement figures:**

8

9 **Figure-S1**

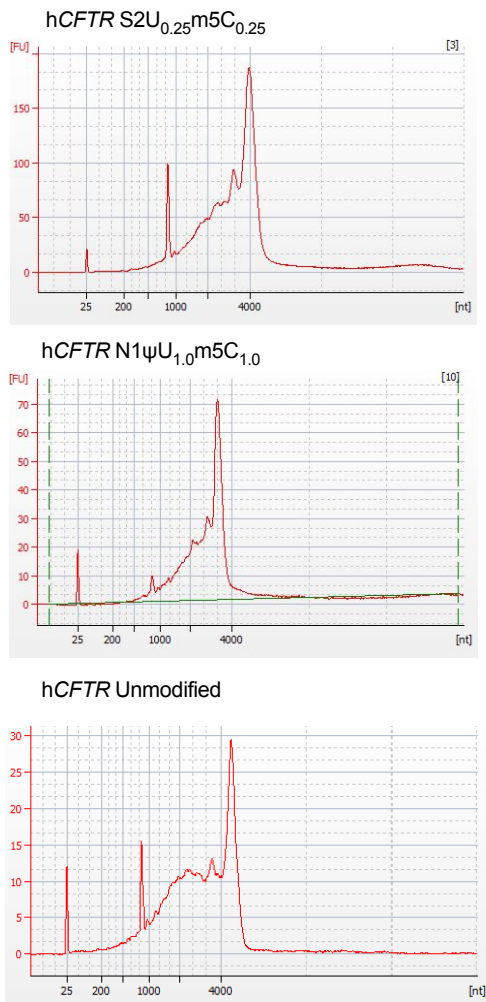

10

11

12 **Figure-S1: Bioanalyzer data after *in vitro* transcription (IVT) of hCFTR (c)mRNA shows the**  
13 **size of (c)mRNA<sup>hCFTR</sup> (Around 4Kb).**

14

15 **Figure-S2**

16

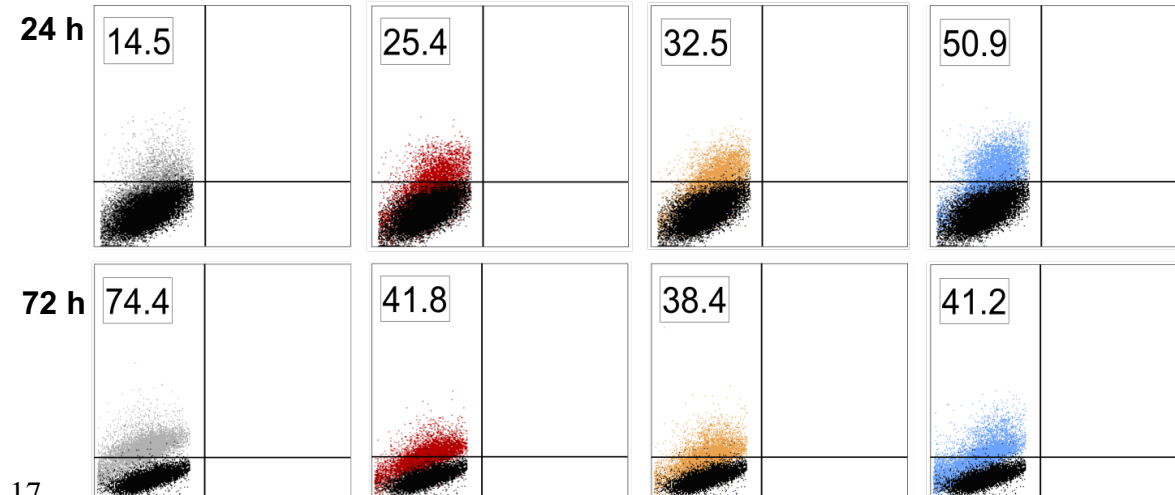

17  
18

| 24h | Treatment                                                          | Sample # | % pos cells | MFI  | Total expression |
|-----|--------------------------------------------------------------------|----------|-------------|------|------------------|
|     | pDNA <sup>hCFTR</sup>                                              | 1        | 14,5        | 15,0 | 217,5            |
|     |                                                                    | 2        | 15,6        | 15,5 | 241,8            |
|     |                                                                    | 3        | 17,2        | 16,6 | 285,5            |
|     | mRNA <sup>hCFTR</sup>                                              | 1        | 25,4        | 22,8 | 579,1            |
|     |                                                                    | 2        | 21,0        | 17,3 | 363,3            |
|     |                                                                    | 3        | 24,6        | 19,9 | 489,5            |
|     | cmRNA <sup>hCFTR</sup><br>s2U <sub>0.25</sub> /m5C <sub>0.25</sub> | 1        | 32,1        | 32,4 | 1040,0           |
|     |                                                                    | 2        | 33,0        | 33,0 | 1089,0           |
|     |                                                                    | 3        | 35,7        | 35,3 | 1260,2           |
|     | cmRNA <sup>hCFTR</sup><br>N1Ψ <sub>1.0</sub> /m5C <sub>1.0</sub>   | 1        | 50,9        | 57,2 | 2911,5           |
|     |                                                                    | 2        | 48,0        | 55,1 | 2644,8           |
|     |                                                                    | 3        | 50,0        | 56,1 | 2805,0           |
| 72h | Treatment                                                          | Sample # | % pos cells | MFI  | Total expression |
|     | pDNA <sup>hCFTR</sup>                                              | 1        | 80,6        | 14,2 | 1140,5           |
|     |                                                                    | 2        | 72,9        | 13,8 | 1007,5           |
|     |                                                                    | 3        | 75,3        | 13,4 | 1007,5           |
|     | mRNA <sup>hCFTR</sup>                                              | 1        | 52,7        | 9,3  | 488,0            |
|     |                                                                    | 2        | 55,8        | 10,0 | 555,2            |
|     |                                                                    | 3        | 54,2        | 9,4  | 507,3            |
|     | cmRNA <sup>hCFTR</sup><br>s2U <sub>0.25</sub> /m5C <sub>0.25</sub> | 1        | 45,8        | 7,8  | 355,9            |
|     |                                                                    | 2        | 42,6        | 8,0  | 372,3            |
|     |                                                                    | 3        | 47,1        | 8,8  | 416,4            |
|     | cmRNA <sup>hCFTR</sup><br>N1Ψ <sub>1.0</sub> /m5C <sub>1.0</sub>   | 1        | 48,6        | 7,9  | 385,4            |
|     |                                                                    | 2        | 45,3        | 8,8  | 434,3            |
|     |                                                                    | 3        | 44,8        | 6,4  | 305,6            |

19

20 **Figure-S2: Expression analyses of hCFTR protein by flow cytometry; n=3**

21 **Figure S3**  
22

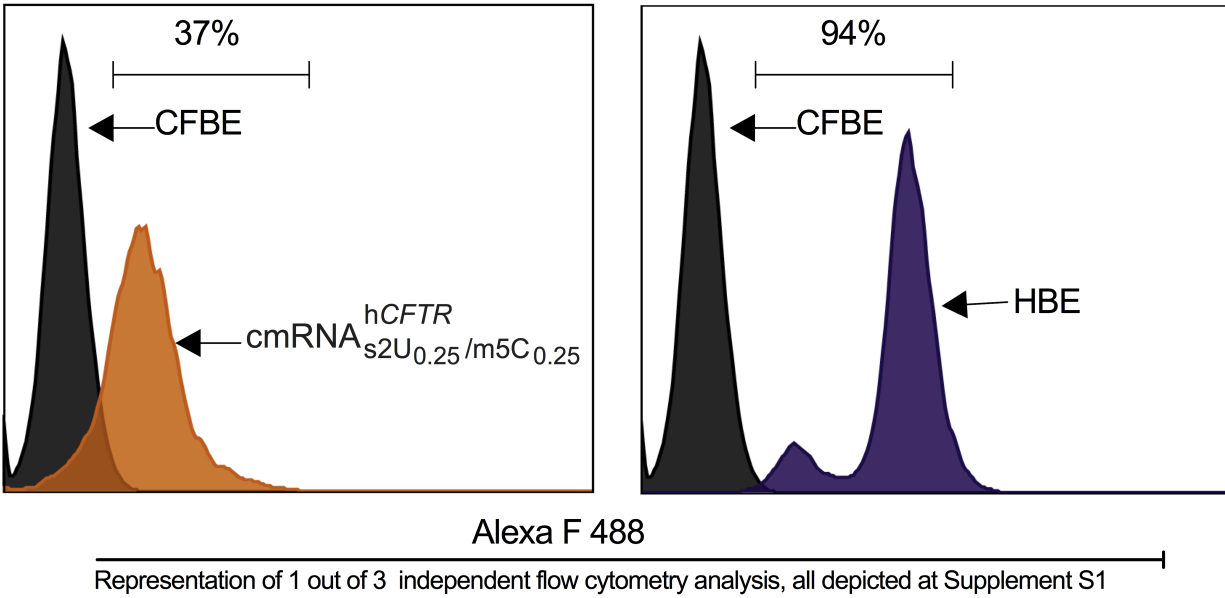

23  
24  
25  
26

**Figure-S3: Expression analyses of hCFTR protein between CFBE41o-, transfected CFBE41o- and 16HBE14o- by flow cytometry.**

27 **Figure S4:**

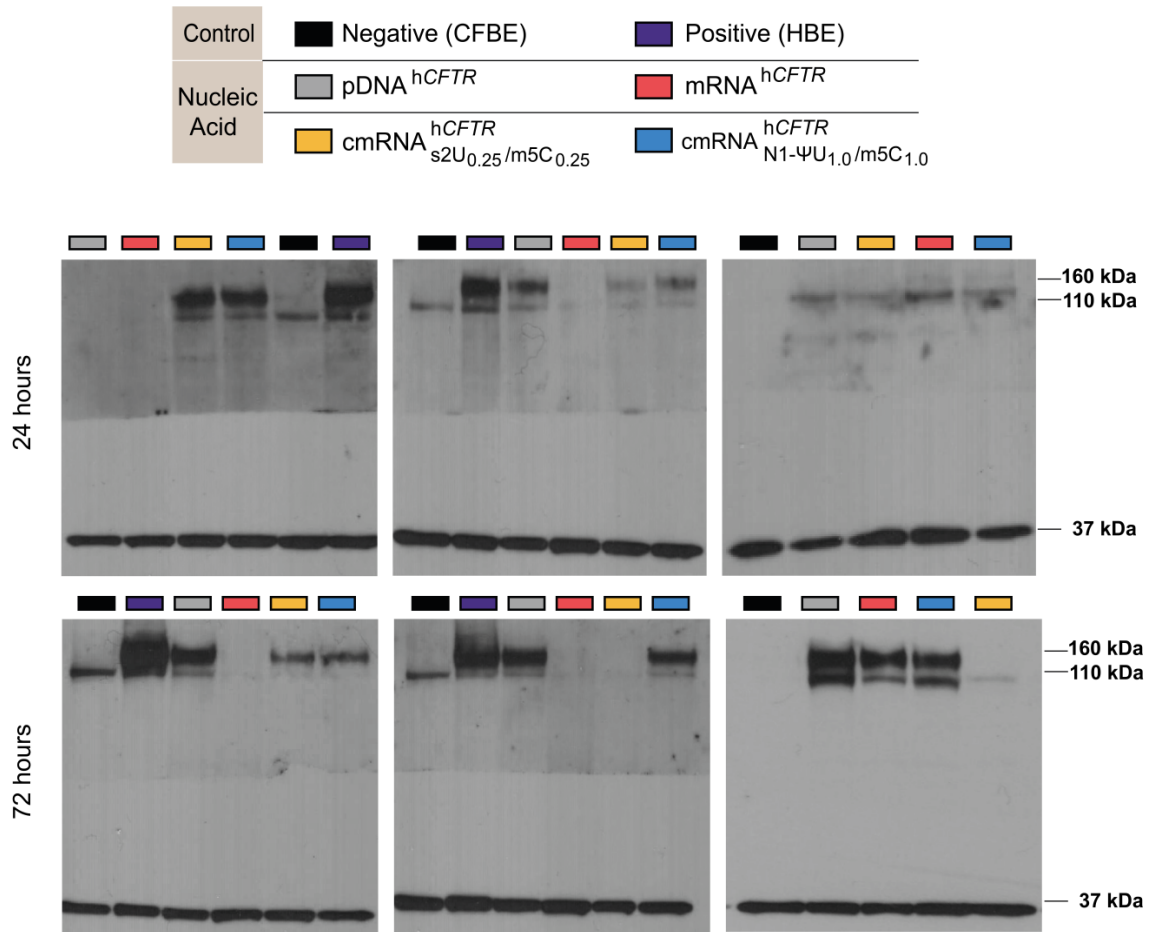

28  
29

30 **Figure. S4: Western blot analyses of hCFTR protein in CFBE41o- and 16HBE14o- cells;**  
 31 **n=3.** All the membranes have been exposed for 30 mins. The Membranes were cut at 80 kDa so  
 32 GAPDH and hCFTR can be stained and detected simultaneously without using membrane stripping  
 33 technique. Before developing the membrane for imaging both parts of the membrane were  
 34 reassembled.

35

36  
37

**Table T1**

| <i>Chitosan-PLGA NPs</i> | <i>Size (nm)</i> | <i>PDI</i> | <i>Zeta potential (mV)</i> |
|--------------------------|------------------|------------|----------------------------|
| batch 1                  | 137,5            | 0,11       | 19,4                       |
| batch 2                  | 144,9            | 0,131      | 21,4                       |
| batch 3                  | 143,3            | 0,131      | 24,8                       |
| Mean                     | 141,9            | 0,124      | 21,9                       |
| SD                       | 3,9              | 0,012      | 2,7                        |

38  
39  
40  
41  
42  
43  
44  
45  
46  
47  
48  
49  
50  
51  
52  
53  
54  
55  
56  
57  
58  
59  
60  
61  
62  
63  
64  
65  
66  
67  
68  
69  
70  
71

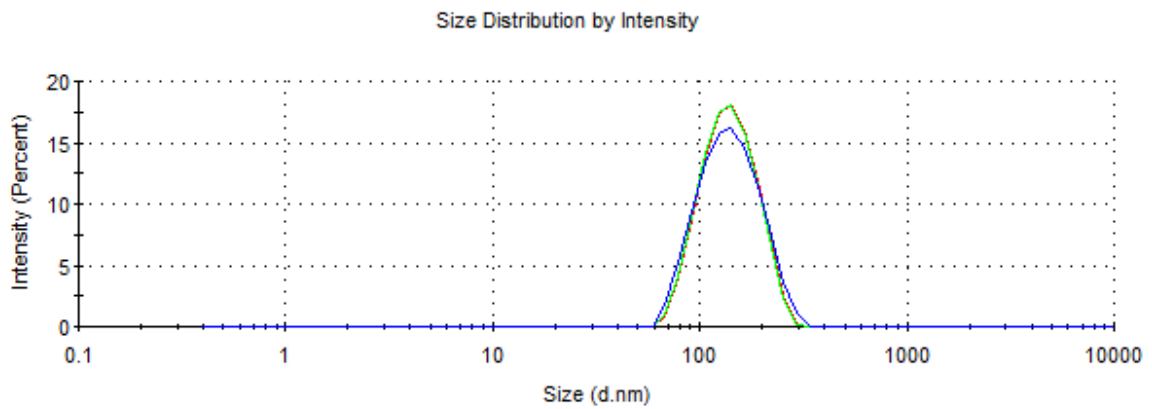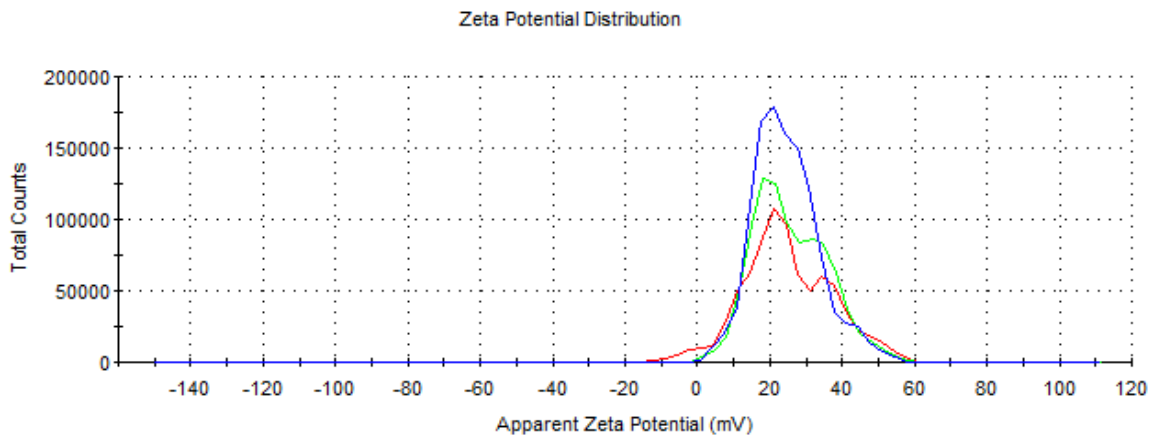

**Table T1: Physicochemical characterization of Chitosan-PLGA nanoparticle**

72  
73  
74  
75  
76  
77  
78  
79  
80  
81  
82  
83  
84  
85  
86  
87  
88  
89  
90  
91  
92  
93  
94  
95

**Figure S5**

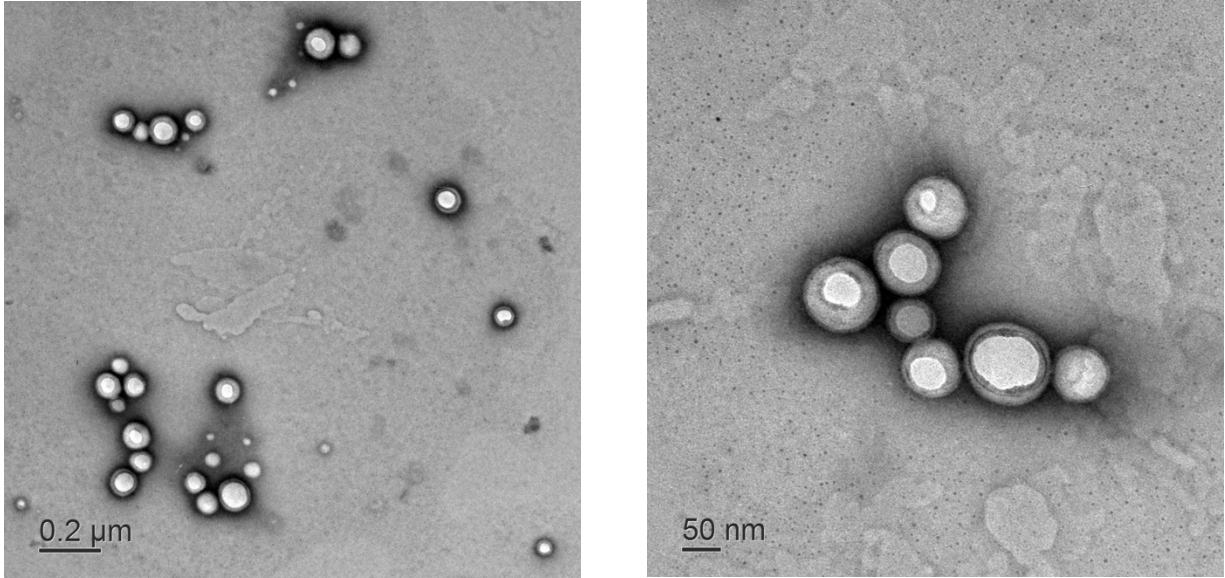

**Figure S5:** CS-PLGA nanoparticles under electron Microscope stained with 0.5% phosphotungstic acid solution.
